# Supplementary material for: Impact of cannabinoids on synapse markers in an SH-SY5Y cell culture model
Source: PubMed Central journal article supplement (PMC11502758; doi:10.1038/s41537-024-00498-6), 2024-10-25
Supplement: 41537_2024_498_MOESM1_ESM.pdf [file 41537_2024_498_MOESM1_ESM.pdf]

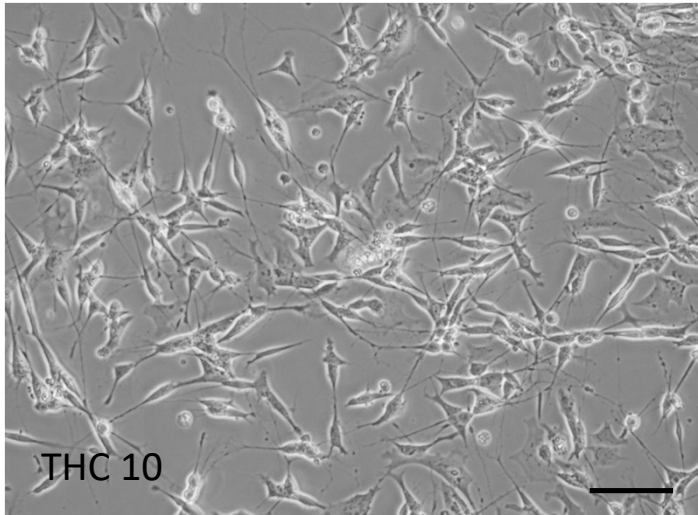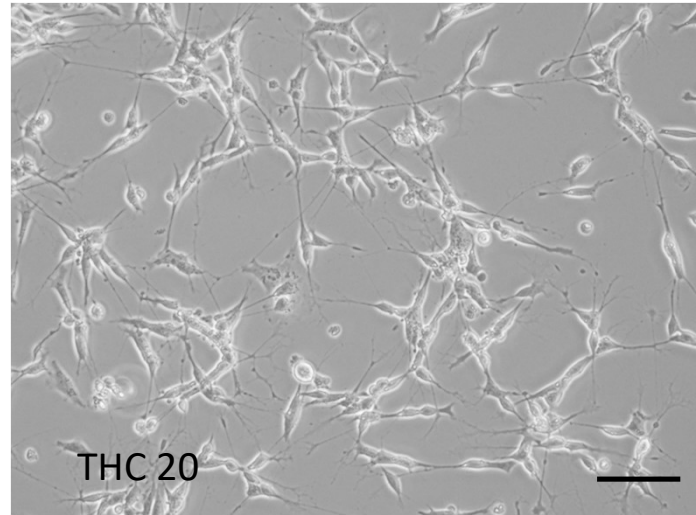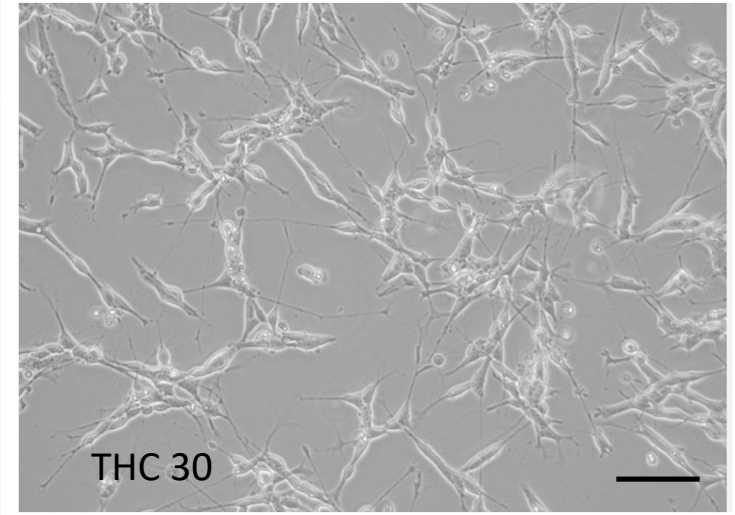

- THC 10: 10  $\mu\text{M}$  THC, only a few transport vesicle-like structures
- THC 20: 20  $\mu\text{M}$  THC, a lot of vesicle-like structures
- THC 30: 30  $\mu\text{M}$  THC, only subtle differences towards THC 20 (with cells eventually showing more cell detritus)
- THC 50: 50  $\mu\text{M}$  THC, strong apoptotic effects (rounding and detachment of cells)

Suppl. Figure 1a: phase contrast pictures of differentiated cells under additional application of 20  $\mu\text{M}$  THC compared to other tested concentrations during preliminary experiments that were performed to figure out the most suitable concentration for our purpose. THC at a concentration of 20  $\mu\text{M}$  has been chosen as it was the lowest concentration that clearly already affected neurites but did not show toxic effects. Scale bar: 50  $\mu\text{m}$ .

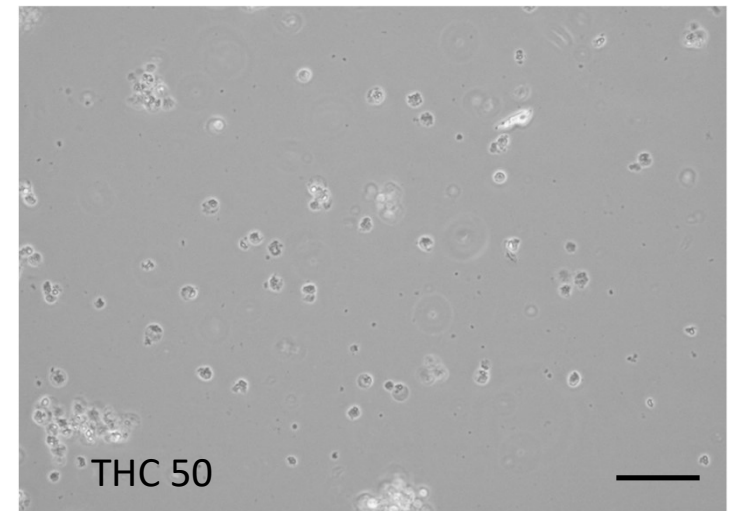

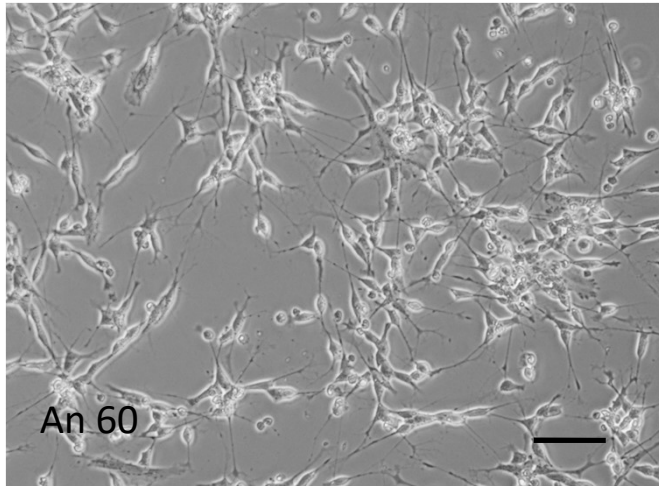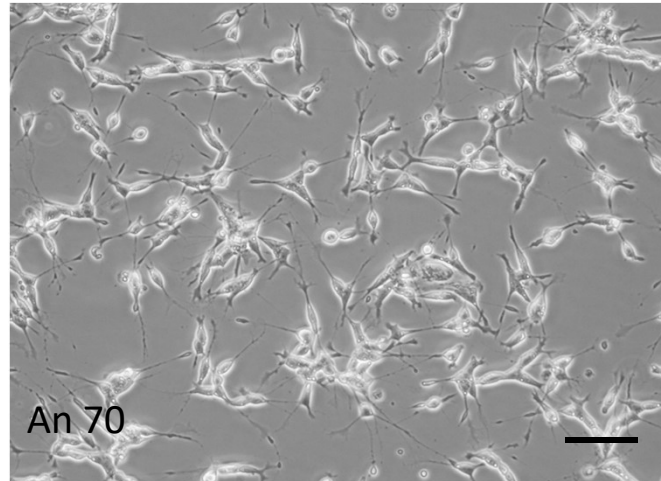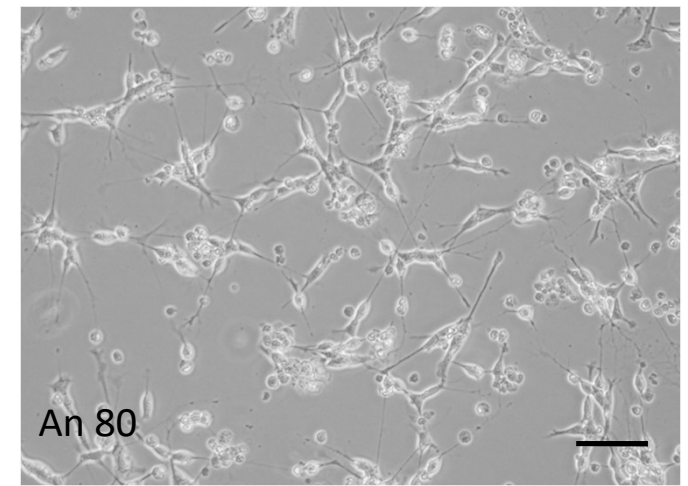

- An 60: 60  $\mu$ M Anandamide, only few transport vesicle-like structures, no blunting of neurites.
- An 70: 70  $\mu$ M Anandamide, a lot of vesicle-like structures, blunting of neurites
- An 80: 80  $\mu$ M Anandamide, first toxic effects appear (rounding and detachment of cells)
- An 90: 90  $\mu$ M Anandamide, strong apoptotic effect.

Suppl. Figure 1b: phase contrast pictures of differentiated cells under additional application of 70  $\mu$ M Anandamide in comparison to other tested concentrations during preliminary experiments that were performed to figure out the most suitable concentration for our purpose. Anandamide at a concentration of 70  $\mu$ M has been chosen as it was the lowest concentration that clearly already affected neurites but did not show toxic effects. Scale bar: 50  $\mu$ m.

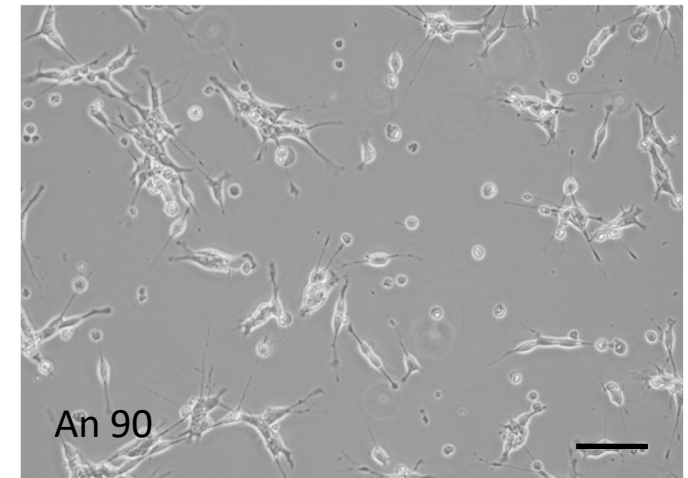

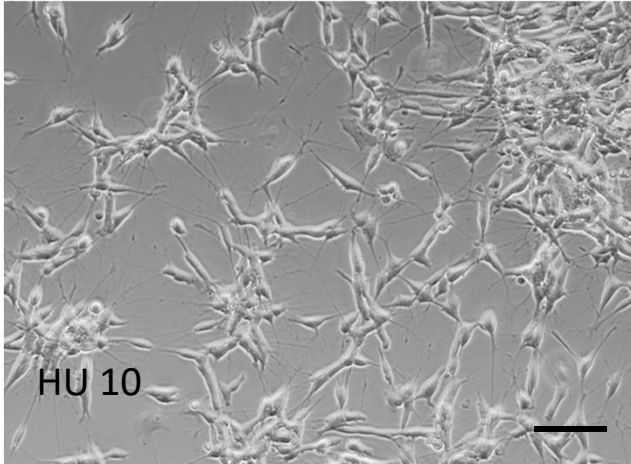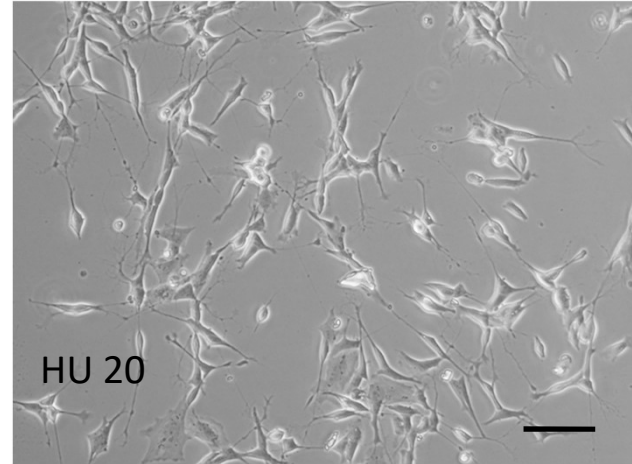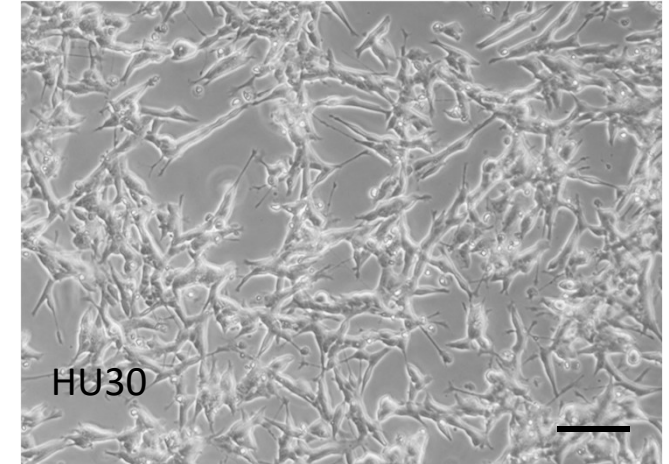

HU 10: 10  $\mu$ M HU210, only a few transport vesicle-like structures, no blunting of neurites.  
HU 20: 20  $\mu$ M HU210, a lot of vesicle-like structures, blunting of neurites  
HU 30: 30  $\mu$ M HU210, first toxic effects appear (cell detritus appear)  
HU 40: 40  $\mu$ M HU210, strong apoptotic effect.

Suppl. Figure 1c: phase contrast pictures of differentiated cells under additional application of 20  $\mu$ M HU210 in comparison to other tested concentrations during preliminary experiments that were performed to figure out the most suitable concentration for our purpose. HU210 at a concentration of 20  $\mu$ M has been chosen as it was the lowest concentration that clearly already affected neurites but did not show toxic effects. Scale bar: 50  $\mu$ m.

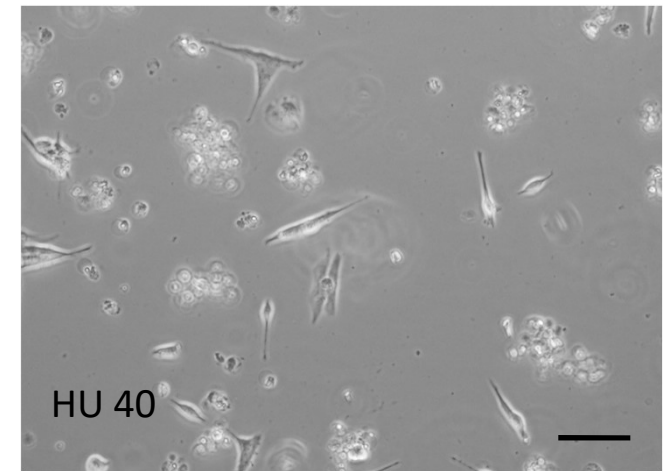

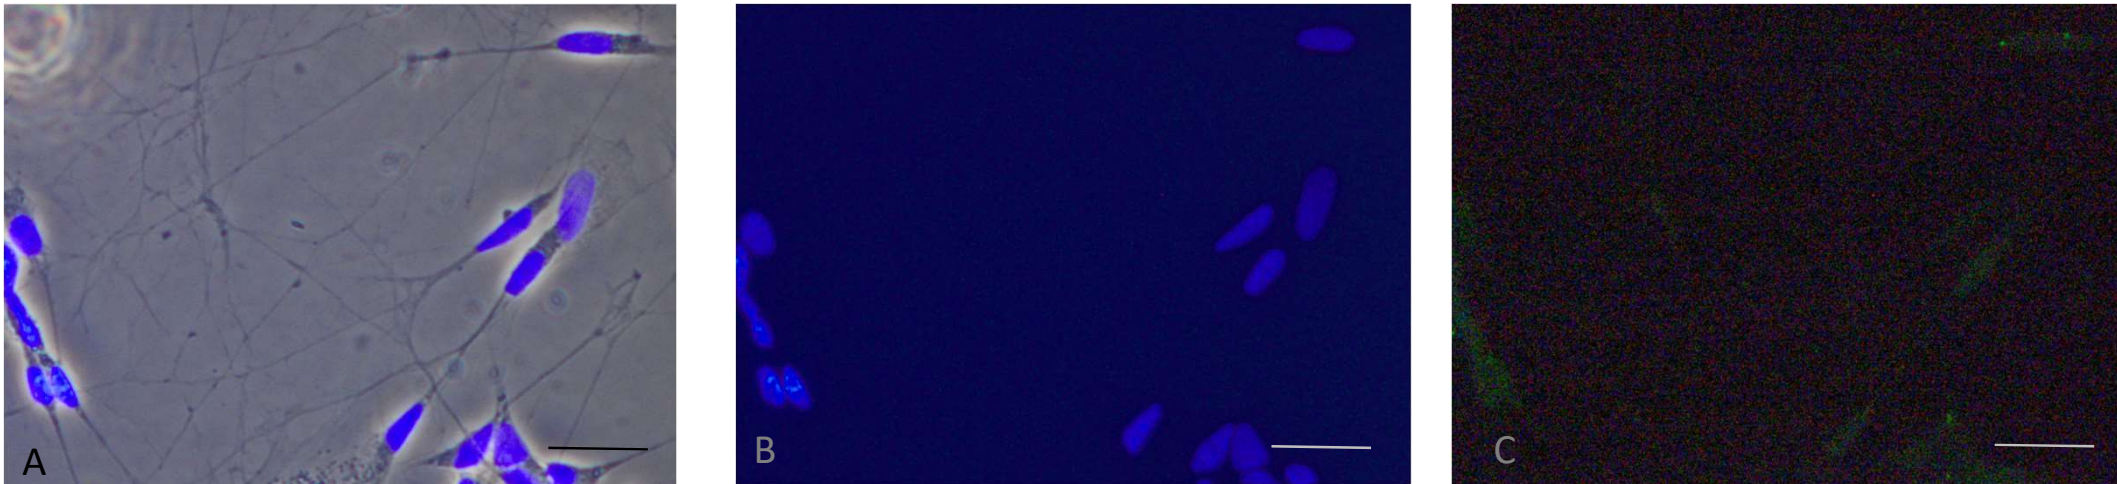

Suppl. Figure 2: Exemplary picture of a negative control for the A488 secondary antibody.

A: Merge of a transmission light picture and DAPI nuclear staining, B: pure DAPI nuclear staining, C: pure A488 secondary antibody

Scale Bar: 50  $\mu\text{m}$ .

| Gene                                     | Gene Symbol/<br>Chromosome | Primers                                                                                                                                   | CpGs were mapped between base positions: | Number of CpGs analysed in this region: | PCR Temperature X (°C) |
|------------------------------------------|----------------------------|-------------------------------------------------------------------------------------------------------------------------------------------|------------------------------------------|-----------------------------------------|------------------------|
| Tau (Microtubule Associated Protein Tau) | MAPT/ 17                   | Fw_o: TAATAAAAAAGGTGGGAAAAAA,<br>Fw_i: AAAGGAAGTAGTTTGGGG,<br><b>Rev: AACCTCCCCAAAAA</b>                                                  | -337 to +27                              | 49                                      | 70                     |
| β-Actin                                  | ACTB/ 7                    | Fw: GTTTAGGTTGGAGTGTAGTG<br><b>Rev_i: TTCACTCTTATTACCCAACT</b><br>Rev_o: CCAAATAAATAAACTAAACTC                                            | -601 to -59                              | 30                                      | 70                     |
| Microtubule Associated Protein 2         | MAP2/ 2                    | Fw_o: TTTTGTTTTTTTGGATGTATTGTGGTT,<br>Fw_i: ATGTATTGTGGTTGGGTTGTGA,<br>Rev: TACTACTACTACTACTACCCA,<br><b>Rev_Seq: AACCTTCTCCAAACCTAAT</b> | -484 to -297                             | 12                                      | 70                     |
| Dopamine Receptor 2                      | DRD2/ 11                   | Fw_o: GTAATTTTGGTTTTGAGTT,<br>Fw_i: GAGGAGGTATAGTTTTTGGT,<br><b>Rev_i: CTAATAAACTCCAACTCCC</b> ,<br>Rev_o: CACAACTTCTAATCTAACCT,          | +132 to +461                             | 53                                      | 62                     |
| Canabinoid Receptor 1                    | CNR1/ 6                    | Fw_o: GTATGTATTAGTTTTTTGGTTT,<br>Fw_i: TTGGTTTGGTTAGGGTGTGA,<br><b>Rev: CTATCTCTAACTCCCTCTC</b>                                           | -289 to -21                              | 19                                      | 60                     |
| Neuregulin-1                             | NRG1/ 8                    | Fw: TTAAGGAGTATGGAGTAGAGGAGG,<br><b>Rev_i: TCCTTTCCCATACTACTAC</b> ,<br>Rev_o: AATAACAATCCTTTATATAAAATAACTA                               | -404 to -37                              | 28                                      | 70                     |
| Neurexin                                 | NRXN1/ 2                   | Fw_o: AAGAGAGGGTGGTGATAA,<br><b>Fw_i: GGTGGTGATAAGTTAGAAG</b> ,<br>Rev: GAATACTATCCTTCTAAAAA                                              | +121 to +239                             | 10                                      | 70                     |
| Synaptophysin                            | SYP/ X                     | Fw: GTGAGATTGTGGTAT,<br><b>Rev_i: CAACAACAACATCAACAATAAAAA</b> ,<br>Rev_o: TACCAAACCTAACCCAC                                              | -191 to +6                               | 20                                      | 70                     |
| Polysialic Acid Transferase 2 (T1)       | ST8SIA2/15                 | Fw_o: TGGGGGTATTATTTTTT<br>Fw_i: TTATTGATTTTAGGGTTAT<br><b>Rev: ATCTTTATCTCCATTAT</b>                                                     | -380 to +9                               | 39                                      | 48                     |
| Polysialic Acid Transferase 4            | ST8SIA4/5                  | Fw: TAGTATTGTGAGTTTTTTTTT<br><b>Rev: CCACCTCTCTCAATAA</b>                                                                                 | -149 to +336                             | 28                                      | 56                     |
| NCAM (Neural Cell Adhesion Molecule)     | NCAM1/ 11                  | Fw_a: AAGGAAGGTTGGGTAGTAGGA,<br>Fw_i: GGGTAGAAGTGTGAAAAG,<br><b>Rev_i: ACAAACCTAAAAACAACAAT</b> ,<br>Rev_a: TCCAAAAAACAACAATCCAA          | -95 to +185                              | 22                                      | 46                     |

**Supplemental Table 1: List of bisulfite-primers.** Primers used for the sequencing PCR are highlighted in bold letters.

| Gene                                       | Gene symbol | Primer Sequences                                                       | Type | Mapped Transcripts (T)                          | Location<br>E= Exon  |
|--------------------------------------------|-------------|------------------------------------------------------------------------|------|-------------------------------------------------|----------------------|
| Tau (Microtubule-associated protein Tau)   | MAPT        | Fw: 5' GACTATCAGGTGAACTTT3'<br>Rev: 5' GCCAGCGTCCGTGT3'                | TG   | All T                                           | E1-E2,<br>E2         |
| Neurofilament-Heavy polypeptide            | NEFH        | Fw: 5' GAGTGGTCCGAGTGAG3'<br>Rev: 5' CTGAATGGCTTCCTGGTAG3'             | TG   | The only T                                      | E1-E2<br>E2-E3       |
| Canabinoid Receptor 1                      | CNR1        | Fw: 5' GATGCGAAGGGATTGCC3'<br>Rev: 5' CAGGAGGTCAGTGGTG3'               | TG   | T NM_016083.4 (predominant)                     | E1-E4,<br>E4         |
| Neuregulin-1                               | NRG1        | Fw: 5' CTAACCTTCTACATCTACA3'<br>Rev: 5' TAAACTCATTGGGCACCTT3'          | TG   | T NM_013959.3 (especially important in neurons) | E8-E10e<br>E10e-E12b |
| Neurexin                                   | NRXN1       | Fw: 5' CCATTAGCCAGACCACAGAT3'<br>Rev: 5' CACAGGGCGGCAGCG3'             | TG   | All T                                           | E23-E24<br>E25       |
| Synaptophysin                              | SYP         | Fw: 5' GCAGCGGTGGCAGTGGC3'<br>Rev: 5' GGACGGGGTAAGAGAGGGG3'            | TG   | The only T                                      | E3,<br>E7            |
| Dysbindin1 (Dystrobrevin Binding Protein1) | DTNBP       | Fw: 5' GTAGTGGGAGTGCGGG3'<br>Rev: 5' GTCCTGGGTTTGCTTTTCA3'             | TG   | T NM_032122.4 and T NM_183040.2 (coding)        | E1<br>E2-E3          |
| Reelin                                     | RELN        | Fw: 5' ATTAGAGCCCTTCCA3'<br>Rev: 5' CCAAGTTCCTGTGTC3'                  | TG   | All T                                           | E9-E10<br>E10        |
| Glyceraldehyde-3-Phosphate Dehydrogenase   | GAPDH       | Fw: 5' CGGATTTGGTCGTATTGGGCG3'<br>Rev: 5' GCTCCTGGAAGATGGTATGGG3'      | RG   | All T                                           | E2-E3<br>E4-E5       |
| Succinate Dehydrogenase Complex, subunit A | SDHA        | Fw: 5' ATGG AAGG TCTC TGCG ATA3'<br>Rev: 5' CCGT AGCC TCCT GTGG3'      | RG   | All T                                           | E5-E6<br>E6-E7       |
| Ubiquitin C                                | UBC         | Fw: 5' AAG GAC ATT TTA GGA CGG GA3'<br>Rev: 5' TTACCAGTCAGAGTCTTACGA3' | RG   | The only T                                      | E1<br>E2             |

**Supplemental Table 2: Primer sequences for real-time measurement of different candidate genes.**

Whenever possible, primers were designed to span an exon-exon border to exclude amplification of genomic DNA residues. This table also depicts every candidate gene's involved exons and amplified transcripts (according to NCBI Reference Sequence for mRNA, NM). TG indicates target genes, and RG indicates the utilized reference genes. The most stable reference gene as revealed by geNorm analysis for our experiment setting and type of cells, was GAPDH.

| Gene                                       | Optimal PCR Temperature (°C), (Y°C) | Primer efficiency | Length of amplicon (Bp) | Chromosome |
|--------------------------------------------|-------------------------------------|-------------------|-------------------------|------------|
| Tau (Microtubule-associated protein Tau)   | 55.5                                | 1.958             | 152                     | 17         |
| Neurofilament-Heavy polypeptide            | 55.5                                | 1.994             | 225                     | 22         |
| Canabinoid Receptor 1                      | 58.1                                | 1.943             | 136                     | 6          |
| Neuregulin-1                               | 50.0                                | 1.990             | 156                     | 8          |
| Neurexin                                   | 61.6                                | 1.973             | 214                     | 2          |
| Synaptophysin                              | 61.6                                | 1.900             | 330                     | X          |
| Dysbindin1 (Dystrobrevin Binding Protein1) | 55.5                                | 1.973             | 228                     | 6          |
| Reelin                                     | 58.1                                | 1.978             | 219                     | 7          |
| Glyceraldehyde-3-Phosphate Dehydrogenase   | 64.4                                | 1.966             | 210                     | 12         |
| Succinate Dehydrogenase Complex, subunit A | 63.5                                | 1.983             | 166                     | 5          |
| Ubiquitin C                                | 60.0                                | 1.980             | 266                     | 12         |

**Supplemental Table 3: Additional information concerning real-time PCR.**

| <b>Secondary Antibody</b>   | <b>Company</b>    | <b>Order no.</b> | <b>Dilution</b> |
|-----------------------------|-------------------|------------------|-----------------|
| Cy 3, goat anti-mouse       | Life Technologies | A10521           | 1:500           |
| Cy 3, goat anti-rabbit      | Millipore         | AP132C           | 1:400           |
| Alexa 488, goat anti-rabbit | Life Technologies | A11008           | 1:250           |

**Supplemental Table 4: Secondary antibodies used for ICC.**



| <b>Primary Antibody</b>          | <b>Company</b>    | <b>Order No.</b> | <b>Dilution</b> | <b>Sec. Antibody</b>   |
|----------------------------------|-------------------|------------------|-----------------|------------------------|
| Tau, rabbit anti-human           | Millipore         | MAB10417         | 1:100           | Cy3 (goat anti rabbit) |
| β-Tubulin, mouse anti-human      | Millipore         | 05-559           | 1:500           | Cy 3 (goat anti mouse) |
| MAP 2, rabbit anti-human         | Millipore         | AB5622           | 1:500           | Alexa 488              |
| DRD2, rabbit anti-human          | Novus Biological  | NB600-1261       | 1:1000          | Alexa 488              |
| CB 1, rabbit anti-human          | Calbiochem        | 209550           | 1:100           | Alexa 488              |
| mGluR1, rabbit anti-human        | Thermo Scientific | PA1-4516         | 1:100           | Alexa 488              |
| NMDAR1, rabbit anti-human        | Pierce            | PA3-102          | 1:300           | Alexa 488              |
| Grik, rabbit anti-human          | Thermo Scientific | PA5-20447        | 1:100           | Alexa 488              |
| PSD 95, rabbit anti-human        | Millipore         | 04-1065          | 1:70            | Alexa 488              |
| Synaptophysin, rabbit anti-human | Abcam             | Ab23754          | 1:500           | Alexa 488              |

**Supplemental Table 5: Primary antibodies used for ICC.**

| Target    | Species | Company    | Order-No. | Dilution |
|-----------|---------|------------|-----------|----------|
| β-Tubulin | Ms      | Millipore  | 05-559    | 1:1000   |
| DRD2      | Rb      | Abcam      | Ab85367   | 1:1000   |
| Grik      | Rb      | Abcam      | Ab67317   | 1:300    |
| NMDAR1    | Ms      | Abcam      | Ab134308  | 1:300    |
| Syp       | Rb      | Invitrogen | MA5-14532 | 1:300    |
| PSD 95    | Rb      | Abcam      | Ab18258   | 1:300    |

**Supplemental Table 6: Western Blot antibodies**

| <b>Suppl. Table 7A:<br/>Methylation Rates</b> |              |                             |                             |                             |                            |
|-----------------------------------------------|--------------|-----------------------------|-----------------------------|-----------------------------|----------------------------|
| <b>Mean, SD</b>                               |              |                             |                             |                             |                            |
| <b>Gene/Substance</b>                         | <b>RA 50</b> | <b>Co</b>                   | <b>THC 20</b>               | <b>An 70</b>                | <b>HU20</b>                |
| <b>MAPT</b>                                   | 26.8 (1.6)   | 28.1 (1.4)                  | 27.9 (1.8)                  | 26.4 (2.2)                  | 28.1 (1.9)                 |
|                                               |              | F(1, 1023)=0.34             | F(3,1513)=0.05              | F(3,1144)=0.22              | F(3,1222)=0.24             |
| <b>β-Aktin</b>                                | 80.8 (3.2)   | 76.2 (2.8)                  | 77.3 (2.7)                  | 75.6 (3.2)                  | 75.9 (2.9)                 |
|                                               |              | F (1, 170)= 1.42            | F (3, 318)= 1.04            | F (3, 315)= 1.17            | F (3, 310)= 0.6            |
| <b>MAP2</b>                                   | 37.0 (7)     | 38.9 (5)                    | 38 (5)                      | 41.9 (9)                    | 40.5 (6.2)                 |
|                                               |              | F(1, 61)= 0.05              | F (3, 143)= 0.018           | F (3, 94)= 0.16             | F(3,122)= 0.05             |
| <b>DRD2</b>                                   | 6.5 (0.5)    | 4.7 (0.5), p<0.05           | 4.3 (0.6), p<0.05           | 4.3 (1), p<0.05             | 4.5 (0.7), p<0.05          |
|                                               |              | F(1,1295)=5.23,<br>p≤0.001  | F(3,1295)=5.23,<br>p≤0.001  | F(3,1431)=6.43,<br>p≤0.001  | F(3,1691)=5.39,<br>p≤0.001 |
| <b>CB1</b>                                    | 9.4 (2.2)    | 2.2 (3.7), p<0.05           | 7.6 (2.1)                   | 8.4 (2.6)                   | 9.1 (2.6)                  |
|                                               |              | F (1, 66)= 4.58,<br>p<0.05  | F (3, 126)= 0.19            | F(3, 125)= 1.09             | F (3,104)=2.2              |
| <b>NRG</b>                                    | 7.6 (3.2)    | 4.6 (4.2), p<0.05           | 6.4 (2.4)                   | 4.6 (5.2)                   | 7.6 (3.1)                  |
|                                               |              | F(1, 50)= 11.47,<br>p≤0.001 | F(3,143)= 0.32              | F(3, 104)= 0.47             | F(3,143)= 1.15             |
| <b>Nx</b>                                     | 2.5 (0.6)    | 0 (0.8)                     | 1 (0.6)                     | 0.4 (0.8)                   | 1.6 (0.8)                  |
|                                               |              | F(1,54)=0.55                | F(3,112)=1.99               | F(3, 98)=0.77               | F(3, 92)=0.548             |
| <b>Syph</b>                                   | 12.1 (2.2)   | 4.7 (2.0), p<0.05           | 3.3 (1.4), p<0.001          | 2.3 (1.6),<br>p<0.001       | 3.3 (1.5), p<0.05          |
|                                               |              | F(1, 80)=6.33, p<0.05       | F(3, 165)= 5.73,<br>p≤0.001 | F(3, 137)= 7.68,<br>p≤0.001 | F(3,147)=5.77,<br>p≤0.001  |
| <b>ST8SIA2</b>                                | 2 (0.2)      | 2.7 (0.2), p<0.05           | 1.9 (0.2)                   | 2 (0.2)                     | 2.6 (0.3)                  |
|                                               |              | F(1,1269)=6.68,<br>p≤0.001  | F(3,1929)=1.25              | F(3,1271)=3.95              | F(3,1732)=2.19             |
| <b>ST8SIA4</b>                                | 6.4 (0.5)    | 6.5 (0.6)                   | 4.6 (0.5), p<0.05           | 4.1 (0.7), p<0.05           | 5.6 (0.5)                  |
|                                               |              | F(1,458)=0.029              | F(3,780)=3.72;<br>p=0,01    | F(3,532)=4.28,<br>p<0.05    | F(3,682)=0.86              |
| <b>NCAM</b>                                   | 5.1 (0.5)    | 5.0 (0.6)                   | 5.3 (0.6)                   | 4.5 (0.7)                   | 5.2 (0.8)                  |
|                                               |              | F(1, 500)= 0.02             | F(3,783)=0.13               | F(3,557)=0.43               | F(3,583)=1.2               |

**Supplemental Table 7A:** Due to the high number of CpGs investigated in every gene, the mixed linear model (based on ANOVA) was used to analyze group differences of mean methylation rates. Respective substance classes were always analyzed with the RA50-treated cell control group. For each analysis, mean values (S.E.M.) of the pairwise comparisons to RA50 are given in the first row of every gene. Respective significance levels are shown in the case of significant group differences (also indicated by a grey background). In the case of non-significant differences, there is no p-value and the background is white to keep it as simple as possible for a better overview. In the second row (below), also the respective group effects characterized by F-values and degrees of freedom as well as the significance level are shown for better assessment of the data.

| <b>Suppl. Table 7B:<br/>Real Time Data</b> |                  |                            |                  |                  |                  |
|--------------------------------------------|------------------|----------------------------|------------------|------------------|------------------|
| <b>Mean, 95 % CI<br/>low/high</b>          |                  |                            |                  |                  |                  |
| <b>Gene/Substance</b>                      | <b>RA</b>        | <b>Co</b>                  | <b>THC 20</b>    | <b>An 70</b>     | <b>Hu 20</b>     |
| <b>MAPT</b>                                | 1<br>(0.36/2.8)  | 1.63 (0.41/2.43)           | 0.6 (0.35/1.04)  | 0.61 (0.51/0.72) | 1.27 (0.68/2.39) |
| <b>NEFH</b>                                | 1<br>(0.45/2.24) | 3.21 (0.33/3.5)            | 0.53 (0.17/1.63) | 1.3 (0.79/2.39)  | 0.95 (0.41/2.19) |
| <b>CNR1</b>                                | 1 (0.3/3.3)      | 0.19 (0.1/1.57),<br>p<0.05 | 0.56 (0.32/0.97) | 0.96 (0.26/3.52) | 1.09 (0.55/2.15) |
| <b>NRG1</b>                                | 1<br>(0.37/2.68) | 0.46 (0.3/1.84)            | 0.34 (0.18/0.64) | 0.29 (0.15/0.53) | 0.27 (0.13/0.54) |
| <b>Nx</b>                                  | 1<br>(0.39/2.58) | 0.31 (0.2/1.9),<br>p<0.05  | 0.52 (0.33/0.81) | 0.52 (0.29/0.91) | 0.46 (0.29/0.74) |
| <b>SYP</b>                                 | 1<br>(0.48/2.09) | 1.31 (0.38/2.64)           | 1.15 (0.58/2.27) | 1.77 (0.87/3.6)  | 1.66 (1/2.75)    |
| <b>Dysb</b>                                | 1<br>(0.49/2.06) | 0.3 (0.24/4.17),<br>p<0.05 | 1.02 (0.46/2.26) | 0.68 (0.38/1.21) | 0.68 (0.53/0.88) |
| <b>RELN</b>                                | 1<br>(0.28/3.56) | 0.24 (0.2/3.72)            | 0.17 (0.03/0.92) | 0.44 (0.12/1.58) | 0.11 (0.04/0.29) |

**Suppl. Table 7B:** RNA expression level in relation to 50  $\mu$ M RA: Means (95% Confidence Interval low/high). Grey background: significantly different in comparison to RA 50, white background: non-significant differences in comparison to RA50. qBase; Mann-Whitney-U-Test.

| <b>Suppl. Table 7C: Western Blot Data</b> |             |             |             |
|-------------------------------------------|-------------|-------------|-------------|
| <b>Mean, SD</b>                           |             |             |             |
| <b>Target/Substance</b>                   | <b>RA50</b> | <b>Co</b>   | <b>THC</b>  |
| <b>β-Tubulin</b>                          | 1 (0)       | 0.58 (0.3)  | 0.53 (0.37) |
| <b>DRD2</b>                               | 1 (0)       | 0.42 (0.02) | 0.5 (0.01)  |
| <b>Grik</b>                               | 1 (0)       | 0.52 (2.9)  | 0.66 (0.09) |
| <b>NMDAR1</b>                             | 1 (0)       | 0.37 (0.01) | 0.61 (0.02) |
| <b>SYP</b>                                | 1 (0)       | 0.68 (0.38) | 0.79 (0.14) |
| <b>PSD 95</b>                             | 1 (0)       | 1.8 (0.48)  | 1.34 (0.07) |

**Suppl. Table 7C:** Protein expression level in relation to 50μM RA treated cells. Mean (SD). Differences were non-significant. Graph Pad Prism; One-way ANOVA.
